# Supplementary material for: SARS-CoV-2 outbreak in a tri-national urban area is dominated by a B.1 lineage variant linked to mass gathering events
Source: bioRxiv or medRxiv preprint supplement (doi:10.1101/2020.09.01.20186155), 2020-11-04
Supplement: Supplementary file [file 2020.09.01.20186155-1.pdf]

## Supplementary material

### SARS-CoV-2 phylogeny during the early outbreak in the Basel area, Switzerland: import and spread dominated by a single B.1 lineage variant (C15324T)

Madlen Stange<sup>1,2,3\*</sup>, Alfredo Mari<sup>1,2,3\*</sup>, Tim Roloff<sup>1,2,3\*</sup>, Helena MB Seth-Smith<sup>1,2,3\*</sup>, Michael Schweitzer<sup>1,2</sup>, Myrta Brunner<sup>4</sup>, Karoline Leuzinger<sup>5,6</sup>, Kirstine K. Sogaard<sup>1,2</sup>, Alexander Gensch<sup>1</sup>, Sarah Tschudin-Sutter<sup>7</sup>, Simon Fuchs<sup>8</sup>, Julia Bielicki<sup>9</sup>, Hans Pargger<sup>10</sup>, Martin Siegemund<sup>10</sup>, Christian H Nickel<sup>11</sup>, Roland Bingisser<sup>11</sup>, Michael Osthoff<sup>12</sup>, Stefano Bassetti<sup>12</sup>, Rita Schneider-Sliwa<sup>4</sup>, Manuel Battegay<sup>7</sup>, Hans H Hirsch<sup>5,6,7</sup>, Adrian Egli<sup>1,2,+</sup>

<sup>1</sup> Applied Microbiology Research, Department of Biomedicine, University of Basel, Basel, Switzerland

<sup>2</sup> Clinical Bacteriology and Mycology, University Hospital Basel, Basel, Switzerland

<sup>3</sup> Swiss Institute for Bioinformatics, Basel, Switzerland

<sup>4</sup> Human Geography, University of Basel, Basel, Switzerland

<sup>5</sup> Clinical Virology, University Hospital Basel, Basel, Switzerland

<sup>6</sup> Transplantation & Clinical Virology, Department of Biomedicine, University of Basel, Basel, Switzerland

<sup>7</sup> Infectious Diseases and Hospital Epidemiology, University Hospital Basel and University of Basel, Basel, Switzerland

<sup>8</sup> Health Services for the City of Basel, Basel, Switzerland

<sup>9</sup> Pediatric Infectious Diseases, Children's University Hospital Basel, Basel, Switzerland

<sup>10</sup> Intensive Care Unit, University Hospital Basel, Basel, Switzerland

<sup>11</sup> Emergency Medicine, University Hospital Basel, Basel, Switzerland

<sup>12</sup> Internal Medicine, University Hospital Basel, Basel, Switzerland

\*these four authors contributed equally to this work

+ correspondence

Adrian Egli, MD PhD

University Hospital Basel

Petersgraben 4

4031 Basel, Switzerland

Email: [adrian.egli@usb.ch](mailto:adrian.egli@usb.ch)

Phone: +41 61 556 5749

## Table of Contents

|                                                                                |           |
|--------------------------------------------------------------------------------|-----------|
| <b>Supplementary methods</b> .....                                             | <b>3</b>  |
| <b>Patients, samples, and diagnosis</b> .....                                  | <b>3</b>  |
| <b>Whole genome sequencing (WGS)</b> .....                                     | <b>3</b>  |
| Consensus sequence generation and detection of mutations .....                 | 3         |
| COVGAP Validation .....                                                        | 3         |
| <b>Phylogenetic lineage assignment of Basel samples</b> .....                  | <b>4</b>  |
| <b>Analysing Basel SARS-CoV-2 genomes in global phylogenetic context</b> ..... | <b>4</b>  |
| <b>Identifying genomes belonging to GISAID emerging clade A20/15324T</b> ..... | <b>5</b>  |
| <b>Identification of S-gene D614G mutation in Basel sequences</b> .....        | <b>5</b>  |
| <b>Supplementary Results</b> .....                                             | <b>6</b>  |
| <b>Basel samples in phylogenetic global context continued</b> .....            | <b>6</b>  |
| Cluster B.1.5 .....                                                            | 6         |
| Cluster B.1.8 .....                                                            | 6         |
| Family clusters within lineage B.2 .....                                       | 6         |
| <b>Supplementary Tables</b> .....                                              | <b>7</b>  |
| <b>References</b> .....                                                        | <b>10</b> |
| <b>Supplementary Figures Legends</b> .....                                     | <b>12</b> |

## Supplementary methods

### Patients, samples, and diagnosis

Respiratory samples from the University Hospital Basel and the University Children's Hospital Basel (UKBB) patients were tested for SARS-CoV-2: from January 23<sup>rd</sup> 2020 testing was based on current case definitions from the Federal Office of Public Health (FOPH); from 27<sup>th</sup> February additionally, all respiratory samples negative for other respiratory pathogens were tested. Patients samples which tested positive<sup>1,2</sup> for SARS-CoV-2 up to and including March 23<sup>rd</sup> were considered eligible for the present study. In total 6,943 diagnostic tests were performed during the study period. The 746 positively tested cases came predominantly from the administrative unit of Basel-City, Riehen, and Bettingen (418, 58%), while the remaining patients were from Basel-Landschaft and neighbouring cantons and countries.

For diagnosis, swabs from the naso- and oropharyngeal sites (NOPS) were taken, and combined into one universal transport medium tube (UTM, Copan). Total nucleic acids (TNAs) were extracted using the MagNA Pure 96 system and the DNA and viral RNA small volume kit (Roche Diagnostics, Rotkreuz, Switzerland) or using the Abbott m2000 Realtime System and the Abbott sample preparation system reagent kit (Abbott, Baar, Switzerland). Aliquots of extractions were sent for diagnosis to Charité, Berlin, Germany from January 23<sup>rd</sup> - 29<sup>th</sup>, and to Geneva to the National Reference Centre (NAVI) in Switzerland from January 29<sup>th</sup>. In-house analysis started February 27<sup>th</sup> as part of the hospital routine diagnostics as previously described<sup>2</sup>.

### Whole genome sequencing (WGS)

SARS-CoV-2 genomes were amplified following the amplicon sequencing strategy of the ARTIC protocol (<https://artic.network/ncov-2019>) with V.1 or V.3 primers<sup>3</sup>. In detail, real-time reverse transcriptase (RT) reactions were run to a total volume of 10µl extracted total nucleic acid. After some optimization, PCR used 25 cycles for samples with a diagnostic cycle threshold ( $C_t$ ) value lower than 21 (viral loads higher than 8.2 log<sub>10</sub> Geq/ml); 40 cycles for all other samples (lower viral load samples) and repeats. Purified amplicons were converted into Illumina libraries with Nextera Flex DNA library prep kit (Illumina) automated on a Hamilton STAR robot, using 5ng input DNA. 96 libraries were multiplexed and sequenced paired-end 150 nucleotides on an Illumina NextSeq 500 instrument.

### *Consensus sequence generation and detection of mutations*

After demultiplexing using bcl2fastq software version v.2.17 (Illumina), COVGAP (COVid-19 Genome Analysis Pipeline) was used (Figure S2). This incorporates: quality filtering using trimmomatic software version v.0.38<sup>4</sup> to remove Illumina adaptors and PCR primer sequences from read ends; removal of reads smaller than 127 bases, and removal of reads with a phred score under 20 (calculated across a 4-base sliding window). Quality filtered reads were mapped to the Wuhan-Hu-1 reference MN908947.3<sup>5</sup> using the BWA aligner<sup>6</sup>. Reads flagged as mapping to the reference were retained<sup>7</sup>, and are deposited under project PRJEB39887. SNPs and indels with respect to the reference sequence were called using pilon version 1.23<sup>8</sup>. Pilon summary metrics 'alternative allele fraction' (AF) and 'depth of valid reads in pileup' (DP) were used to identify major and minor alleles across all bases, which is not implemented in pilon itself. Major alleles were called if supported by 70% of the reads covering the variant locus (AF) for any locus with a minimum of 50x coverage (DP). Variants were applied to the reference to produce a consensus sequence; any base position with less than 50x coverage was masked with ambiguous characters (Ns) using BCFTools version 1.10.2<sup>9</sup>. Consensus sequences were accepted for further analysis when containing up to 10% Ns. Summary statistics, logs, coverage plots, and genome stack plots were generated using R version 3.6.0 and packages Gviz v1.30<sup>10</sup>, Sushi v1.23<sup>11</sup>, seqinr v3.6.1<sup>12</sup>, and ggplot2 v3.11<sup>13</sup>. COVGAP also provides per genome quality control visual outputs (Figure S5) and is available at <https://github.com/appliedmicrobiologyresearch>.

Quality control statistics such as the relationship between  $C_t$ -value and number of mapped reads and coverage are presented in Figure S3. In general, we observed a negative trend linking  $C_t$  values and percentage of ambiguous bases (Ns) being called as a result of low coverage. Sequences passing the quality filter (n=533) showed a lower  $C_t$  value (median: 22.4±5.14) than the ones that failed (n=156; median: 35.75-9±5.75).

### *COVGAP Validation*

We used a set of 15 randomly *in silico* mutated SARS-CoV-2 mock genomes for the validation of the specificity (identification of true negatives) and accuracy (identification of true negatives and true positives) of COVGAP. Additionally, the genome MT339040, which harbours an 81 nucleotide deletion in the ORF7a gene and a

further seven SNPs relative to the reference<sup>14</sup> was used. Together, the mock genomes possess 38 mutations including 30 SNPs, six deletions and two insertions across the reference genome MN908947.3. The genomes were then shredded to artificial paired-end 150 nucleotide reads using SAMtools wgsim<sup>9</sup> and processed by COVGAP. For validation purposes, original mock genomes and the COVGAP generated genomes from the shredded reads were aligned using Seaview v4.6 (Gouy, 2009) and clustalw (Sievers, 2011). A phylogeny was built using PhyML within Seaview with default parameters.

### Phylogenetic lineage assignment of Basel samples

To assess the phylogenetic diversity of SARS-CoV-2 samples during the early phase of the pandemic we inferred the lineage assignment for each consensus sequence derived from the COVGAP pipeline using PANGOLIN ver. May 19th (Phylogenetic Assignment of Named Global Outbreak LINEages)<sup>15</sup> available at [github.com/hCoV-2019/pangolin](https://github.com/hCoV-2019/pangolin). Details on lineage summaries, describing which countries lineages have been reported from and where transmission events have been recorded, can be found at <https://github.com/hCoV-2019/lineages>. Lineage assignments were used to aid visualization of phylogenetic diversity in Basel in a global context. For global sequences we used the PANGOLIN lineage assignments as provided by GISAID (<https://www.gisaid.org/>;<sup>16,17</sup>) (details next section), which were used for plotting purposes on phylogenetic trees.

To compare the lineage diversity in Switzerland and Basel-City to neighbouring European countries (Austria, France, Germany, and Italy) during the early phase of the pandemic, we visualized relative abundances of lineages using all high-quality, on GISAID (downloaded June 22<sup>nd</sup>, 2020) available consensus sequences for the time until March 23<sup>rd</sup> from Austria (N = 188), France (N = 230), Germany (N = 133), and Italy (N = 98). For Switzerland (N = 673), we combined our sequences (N = 468) with other sequence data from Switzerland published on GISAID. To infer the diversity for canton Basel-City (including Bettingen and Riehen) excluding sequences that were obtained from commuters, we used the Basel-City portion (N = 376) of the Basel area cohort excluding samples from patients from cities outside of the administrative district of Basel-City. We calculated Simpson diversity (inverse Simpson concentration) as implemented in the SpadeR package v.0.0.1<sup>18-20</sup>, which controls for lineage abundance differences between the countries, which is dependent on available sequence data, and which ranges from 0 (no diversity) to indefinite (large diversity).

### Analysing Basel SARS-CoV-2 genomes in global phylogenetic context

High-quality and full-length consensus sequences and corresponding metadata (sample ID, date of sample, geographic location of sampling, PANGOLIN lineage) from global viruses were downloaded from GISAID on June 22<sup>nd</sup>, 2020, making 49,284 individual genome sequences. 43,252 sequences were retained after filtering for genomes with under 10% ambiguous characters (Ns) (author Genivaldo Gueiros Z. Silva)<sup>21</sup>. Metadata and consensus sequences of the Basel samples and global data from GISAID were combined for further joint analysis, which were performed using custom R scripts and the nextstrain command line interface analysis pipeline v.2.0.0 (nextstrain.org) and augur v.8.0.0<sup>22</sup>.

Dates in our study samples correspond to date of sampling. Sequences were filtered by date from December 1<sup>st</sup> 2019 to March 23<sup>rd</sup> 2020 using an R custom script in R version 4.0.0<sup>23</sup> and packages tidyverse ver. 1.1.0<sup>24</sup>, dplyr ver. 1.0.0<sup>25</sup>, and readr ver. 1.3.1.<sup>26</sup>: 15,973 consensus sequences, including the Basel area sequences, remained. These time-filtered sequences were sub-sampled by geographic location to 30 sequences per country and month. Non-human derived viruses as well as sequences with other ambiguous characters (Us), as well as those from cruise ships, and duplicated sequences defined by the nextstrain team as of June 24<sup>th</sup> (<https://github.com/nextstrain/ncov/>) were excluded using *augur filter*<sup>22</sup> resulting in 2,485 sequences for the final phylogenetic analysis dataset.

Consensus sequences were aligned to the NCBI Refseq sequence Wuhan-Hu-1 reference MN908947.3 using mafft v7.467 with method FFT-NS-fragment<sup>27</sup> and options --reorder --keeplength --mapout --kimura 1 --addfragments --auto. The resulting alignment was end-trimmed to remove low-quality bases (bases 1-55; 29804-29903). We masked homoplasic sites (**Table S2**) that have no phylogenetic signal<sup>28</sup> (deposited at [https://github.com/W-L/ProblematicSites\\_SARS-CoV2](https://github.com/W-L/ProblematicSites_SARS-CoV2)). Given the constant updates which this homoplasic site list undergoes, we used to the data released on June 19<sup>th</sup>, 2020. Masking was done using *augur mask*.

The resulting alignment was analysed in IQ-TREE 2<sup>29</sup> for tree inference using *augur tree* with substitution model GTR+G. The tree in Newick format was then subjected, together with the date information of each genome and the initial sequence alignment, to an estimation of the evolutionary rate by a regression of the divergence (number of mutations) against the sampling date using TreeTime<sup>30</sup> implemented in *augur refine*. Genomes or branches that deviated more than four interquartile ranges from the root to the tip versus the time tree were removed as likely outliers. The resulting time-calibrated and divergence trees were re-rooted to

MN908947.3 and MT291826.1, the first official cases and published genomes of SARS-CoV-2 from Wuhan, China.

Ancestral trait reconstruction of each patient's viral genome was done for region (continent) and country as well as region and country of exposure using *augur* traits with a sampling bias correction of 2.5. Internal nodes and tips (actual genomes) were annotated regarding their nucleotide and amino acid changes in relation to the reference using *augur ancestral* and *augur translate*, respectively. All data were exported as json files (supplementary files) using *augur export v2* to be visualized in *auspice v2*<sup>22</sup>.

Identified clades of interest were further inspected for existing epidemiological links using data collected by the University Hospital.

### **Identifying genomes belonging to GISAID emerging clade A20/15324T**

To identify a possible geographic origin of the synonymous C15324T mutation in *ORF1ab*, we performed a search on all available GISAID genomes as of August 12<sup>th</sup>, 2020. We downloaded all high quality and complete genomes that were assigned to GISAID legacy clade G (corresponds to clade 20A) and PANGOLIN lineage B.1 (all three are mostly congruent<sup>31</sup>) with a collection date between December 2019 and March 23<sup>rd</sup>, 2020 (N = 2,856). We used Nextclade version 0.3.5 (<https://clades.nextstrain.org>) to infer genomic mutations and filtered for sequences that contained C15324T. This procedure allowed avoidance of homoplastic mutations at this site. Further, we downloaded metadata for all high quality and complete genomes (as of August 12<sup>th</sup>, 2020) irrespective of clade to calculate summary statistics of number of genomes sequenced per country.

### **Identification of S-gene D614G mutation in Basel sequences**

We screened the early phase Basel sequences for the mutation at nucleotide position 23,403 based on the alignment to the *Wuhan-Hu-1* reference sequence MN908947.3. Viral load ( $C_t$ -value) of patients that carried lineages with a mutated S-D614G gene (N = 274) were compared to patients that carried the ancestral allele (N = 12) using a Mann-Whitney U test.

## Supplementary Results

### Basel samples in phylogenetic global context continued

#### *Cluster B.1.5*

Isolates that are assigned to lineage B.1.5 make up 2·6% of USB isolates (**Figure S6B**). They all share the A20268G mutation. Three unresolved branches defined by at least one additional mutation each, diverge from the internal node consisting of, from top to bottom, six (C25658T), six (C28854T), and one (G25483A, C4893T, C23380A, C26509T [mutations in order of temporal appearance]) Basel area isolates. Individual isolates can exhibit one to three additional mutations. Isolates date from March 13<sup>th</sup> to March 23<sup>rd</sup> with an inferred node age of February 19<sup>th</sup> (CI: January 13<sup>th</sup>-February 20<sup>th</sup>, 2020). No social connections for transmission patterns within each branch could be inferred from the available patient data. Searching the clade defining mutations in the nextstrain.org phylogeny we gain the following insights. Mutation C25658T (plus the clade defining A20268G) is found in one isolate (Oman/RESP-20-6701/2020 from March 28<sup>th</sup>); C28854T is found 17 isolates, two of which show no additional mutations (Norway/2088/2020 from March 17<sup>th</sup>, Latvia/045/2020 from March 22<sup>nd</sup>) just like two of our isolates (42193056, 42189239). Derived isolates originate from Switzerland, Scotland, Romania, USA, Taiwan, and England. Mutation G25483A recorded in a single isolate (42202280) is not currently reported in the nextstrain.org phylogeny.

#### *Cluster B.1.8*

Isolates that are assigned to lineage B.1.8 make up 0·7% of USB isolates (**Figure S6C**). They all share the A24862G mutation. Isolates date from March 14<sup>th</sup> to March 22<sup>nd</sup> with an inferred internal node age of February 1<sup>st</sup> (CI: January 12<sup>th</sup>-March 8<sup>th</sup>, 2020). Two isolates (42191012, 42202147) exhibit the identical mutational pattern (additional T658C, C28829T) but have no known epidemiological link. Our own global comparison identified an isolate from Germany (Germany/NRW-34/2020 from March 16<sup>th</sup>) that exhibits the same mutations. Searching the clade defining mutation in the nextstrain.org phylogeny does not yield better insights into the evolution of the lineages as no isolates with the same pattern could be identified.

#### *Family clusters within lineage B.2*

We identified eight genomes that were assigned to lineage B.2 (**Figure S6D**). They all share the G26144T mutation that translates into amino acid change ORF3a-G251V and date from March 13<sup>th</sup> to March 22<sup>nd</sup> with an inferred internal node age of January 15<sup>th</sup> (CI: January 13<sup>th</sup>-January 18<sup>th</sup>, 2020). This cluster harbours two household transmission clusters: *Family 2* with two members and *Family 3* with three members. These two clusters share C14805T (synonymous in *ORF1ab*) and exhibit unique additional mutations C9319T (synonymous in *ORF1ab*) and G12278T (ORF1ab-A4005S), G26730T (M-V70F), G29414T (N-A381S), respectively. We find no evidence of further community transmission. These mutational combinations are not currently represented in the full global phylogeny (nextstrain.org), suggesting that quarantine measures were effective in these cases and inhibited further transmission events.

## Supplementary Tables

**Table S1. Counts and description of the in silico mutated genome community used for COVGAP validation.** Each observation consists of the genome position multiplied by the number of samples in which it appears. Attached as additional file.

**Table S2. Nucleotide position in relation to the Wuhan-Hu1 reference sequence that were masked for phylogenetic inferences, due to homoplasies.** Inferred by contributors to [https://github.com/W-L/ProblematicSites\\_SARS-CoV2](https://github.com/W-L/ProblematicSites_SARS-CoV2).

| Start position | End position |
|----------------|--------------|
| 635            | 635          |
| 2091           | 2091         |
| 2094           | 2094         |
| 3145           | 3145         |
| 3564           | 3564         |
| 4050           | 4050         |
| 5736           | 5736         |
| 6869           | 6869         |
| 8022           | 8022         |
| 8790           | 8790         |
| 10129          | 10129        |
| 11074          | 11074        |
| 11083          | 11083        |
| 11535          | 11535        |
| 13402          | 13402        |
| 13408          | 13408        |
| 13476          | 13476        |
| 13571          | 13571        |
| 14277          | 14277        |
| 15922          | 15922        |
| 16887          | 16887        |
| 19484          | 19484        |
| 21575          | 21575        |
| 22335          | 22335        |
| 24389          | 24389        |
| 24390          | 24390        |
| 24933          | 24933        |
| 26549          | 26549        |
| 29037          | 29037        |
| 29553          | 29553        |

**Table S3. List of countries that recorded genomes with mutation C15324T and number of total genomes sequenced until March 23<sup>rd</sup> 2020.**

| Country                          | number genomes with C15324T | Total genomes sequenced until March 23 <sup>rd</sup> | % genomes with mutation | % of population sequenced | Population    |
|----------------------------------|-----------------------------|------------------------------------------------------|-------------------------|---------------------------|---------------|
| Argentina                        | 1                           | 4                                                    | 25.00                   | 0.00001                   | 45,195,774    |
| Australia                        | 14                          | 1092                                                 | 1.28                    | 0.00428                   | 25,499,884    |
| Austria                          | 3                           | 244                                                  | 1.23                    | 0.00271                   | 9,006,398     |
| Belgium                          | 40                          | 268                                                  | 14.93                   | 0.00231                   | 11,589,623    |
| Benin                            | 1                           | 6                                                    | 16.67                   | 0.00005                   | 12,123,200    |
| Bosnia and Herzegovina           | 2                           | 12                                                   | 16.67                   | 0.00037                   | 3,280,819     |
| Brazil                           | 1                           | 226                                                  | 0.44                    | 0.00011                   | 212,559,417   |
| Canada                           | 7                           | 405                                                  | 1.73                    | 0.00107                   | 37,742,154    |
| Chile                            | 2                           | 120                                                  | 1.67                    | 0.00063                   | 19,116,201    |
| Costa Rica                       | 1                           | 40                                                   | 2.50                    | 0.00079                   | 5,094,118     |
| Democratic Republic of the Congo | 11                          | 35                                                   | 31.43                   | 0.00004                   | 89,561,403    |
| England                          | 4                           | 5643 (UK)                                            | 0.01                    | 0.00831                   | 67,886,011    |
| France                           | 69                          | 369                                                  | 18.70                   | 0.00057                   | 65,273,511    |
| Germany                          | 2                           | 147                                                  | 1.36                    | 0.00018                   | 83,783,942    |
| Hungary                          | 2                           | 18                                                   | 11.11                   | 0.00019                   | 9,660,351     |
| Iceland                          | 5                           | 522                                                  | 0.96                    | 0.15297                   | 341,243       |
| India                            | 1                           | 119                                                  | 0.84                    | 0.00001                   | 1,380,004,385 |
| Israel                           | 1                           | 72                                                   | 1.39                    | 0.00083                   | 8,655,535     |
| Japan                            | 3                           | 343                                                  | 0.87                    | 0.00027                   | 126,476,461   |
| Luxembourg                       | 24                          | 116                                                  | 20.69                   | 0.01853                   | 625,978       |
| Morocco                          | 3                           | 13                                                   | 23.08                   | 0.00004                   | 36,910,560    |
| Netherlands                      | 2                           | 617                                                  | 0.32                    | 0.00360                   | 17,134,872    |
| Oman                             | 1                           | 21                                                   | 4.76                    | 0.00041                   | 5,106,626     |
| Portugal                         | 8                           | 570                                                  | 1.40                    | 0.00559                   | 10,196,709    |
| Russia                           | 1                           | 59                                                   | 1.69                    | 0.00004                   | 145,934,462   |
| Scotland                         | 4                           | 5643 (UK)                                            | 0.01                    | 0.00831                   | 67,886,011    |
| Senegal                          | 3                           | 24                                                   | 12.50                   | 0.00014                   | 16,743,927    |
| South Korea                      | 1                           | 196                                                  | 0.51                    | 0.00038                   | 51,269,185    |
| Switzerland                      | 57 (386)*                   | 213 (675)*                                           | 26.8 (57.2)*            | 0.00780                   | 8,654,622     |
| Taiwan                           | 3                           | 95                                                   | 3.16                    | 0.00040                   | 23,816,775    |
| USA                              | 1                           | 4150                                                 | 0.02                    | 0.00125                   | 331,002,651   |
| Vietnam                          | 1                           | 59                                                   | 1.69                    | 0.00006                   | 97,338,579    |

\* Number in brackets summarize counts of genomes from GISAID plus genomes from this study

**Table S4. GISAID identifiers and dates of sampling for all sequences that belong to emerging clade 20A/15324T with a collection date until March 23<sup>rd</sup>, 2020 (N = 279). Supplied as additional file.**



**Table S5. Diversity indices for SARS-CoV-2 lineages in Switzerland and neighbouring countries.**

| Country     | Coefficient of co-variation | Shannon Entropy H' | Shannon Diversity | Simpson Concentration Index D' | Simpson Diversity |
|-------------|-----------------------------|--------------------|-------------------|--------------------------------|-------------------|
| Austria     | 1·577                       | 1·680              | 5·365             | 0·2679                         | 3·7322            |
| France      | 1·762                       | 0·421              | 1·524             | 0·8144                         | 1·2278            |
| Germany     | 1·358                       | 1·637              | 5·137             | 0·2583                         | 3·8715            |
| Italy       | 0·751                       | 1·067              | 2·908             | 0·3971                         | 2·5181            |
| Switzerland | 2·768                       | 0·869              | 2·385             | 0·6156                         | 1·6243            |

## References

1. Goldenberger D, Leuzinger K, Sogaard KK, et al. Brief validation of the novel GeneXpert Xpress SARS-CoV-2 PCR assay. *J Virol Methods* 2020; **284**: 113925.
2. Leuzinger K, Roloff T, Gosert R, et al. Epidemiology of SARS-CoV-2 Emergence Amidst Community-Acquired Respiratory Viruses. *J Infect Dis* 2020.
3. Quick J. nCoV-2019 sequencing protocol. protocols.io 2020. [dx.doi.org/10.17504/protocols.io.bdp7i5rn](https://doi.org/10.17504/protocols.io.bdp7i5rn).
4. Bolger AM, Lohse M, Usadel B. Trimmomatic: a flexible trimmer for Illumina sequence data. *Bioinformatics* 2014; **30**(15): 2114-20.
5. Wu F, Zhao S, Yu B, et al. A new coronavirus associated with human respiratory disease in China. *Nature* 2020; **579**(7798): 265-9.
6. Li H, Durbin R. Fast and accurate short read alignment with Burrows-Wheeler transform. *Bioinformatics* 2009; **25**(14): 1754-60.
7. Wala J, Zhang CZ, Meyerson M, Beroukhi R. VariantBam: filtering and profiling of next-generation sequencing data using region-specific rules. *Bioinformatics* 2016; **32**(13): 2029-31.
8. Walker BJ, Abeel T, Shea T, et al. Pilon: an integrated tool for comprehensive microbial variant detection and genome assembly improvement. *PLoS One* 2014; **9**(11): e112963.
9. Li H. A statistical framework for SNP calling, mutation discovery, association mapping and population genetical parameter estimation from sequencing data. *Bioinformatics* 2011; **27**(21): 2987-93.
10. Hahne F, Ivanek R. Visualizing Genomic Data Using Gviz and Bioconductor. *Methods Mol Biol* 2016; **1418**: 335-51.
11. Phanstiel DH, Boyle AP, Araya CL, Snyder MP. Sushi.R: flexible, quantitative and integrative genomic visualizations for publication-quality multi-panel figures. *Bioinformatics* 2014; **30**(19): 2808-10.
12. D. C, J.R. L. SeqinR 1.0-2: A Contributed Package to the R Project for Statistical Computing Devoted to Biological Sequences Retrieval and Analysis. . In: U. B, M. P, H.E. R, M. V, eds. Structural Approaches to Sequence Evolution Biological and Medical Physics, Biomedical Engineering. Berlin, Heidelberg: Springer; 2007.
13. Wickham H. ggplot2: Elegant Graphics for Data Analysis. <https://ggplot2-book.org/>.
14. Holland LA, Kaelin EA, Maqsood R, et al. An 81-Nucleotide Deletion in SARS-CoV-2 ORF7a Identified from Sentinel Surveillance in Arizona (January to March 2020). *J Virol* 2020; **94**(14).
15. Rambaut A, Holmes EC, O'Toole Á, et al. A dynamic nomenclature proposal for SARS-CoV-2 lineages to assist genomic epidemiology. *Nat Microbiol* 2020.
16. Elbe S, Buckland-Merrett G. Data, disease and diplomacy: GISAID's innovative contribution to global health. *Glob Chall* 2017; **1**(1): 33-46.
17. Shu Y, McCauley J. GISAID: Global initiative on sharing all influenza data - from vision to reality. *Euro Surveill* 2017; **22**(13): 30494.
18. Chao A, Chiu CH, Hsieh TC. Proposing a resolution to debates on diversity partitioning. *Ecology* 2012; **93**(9): 2037-51.
19. Chao A, Jost L. Estimating diversity and entropy profiles via discovery rates of new species. *Methods in Ecology and Evolution* 2015; **6**(8): 873-82.
20. Chao A, Wang Y, Jost L. Entropy and the species accumulation curve: A novel entropy estimator via discovery rates of new species. *Methods Ecol Evol* 2013; **4**: 1091-100.
21. Cock PJ, Antao T, Chang JT, et al. Biopython: freely available Python tools for computational molecular biology and bioinformatics. *Bioinformatics* 2009; **25**(11): 1422-3.
22. Hadfield J, Megill C, Bell SM, et al. Nextstrain: real-time tracking of pathogen evolution. *Bioinformatics* 2018; **34**(23): 4121-3.
23. Team RC. R: A language and environment for statistical computing. <https://www.r-project.org/>.
24. Wickham H, Henry L. tidy: Tidy Messy Data. R package version 1.1.0. . 2020. <https://CRAN.R-project.org/package=tidy>.
25. Wickham H, François R, Henry L, Müller K. dplyr: A Grammar of Data Manipulation. R package version 1.0.0. . 2020. <https://CRAN.R-project.org/package=dplyr>.
26. Wickham H, J H, Francois R. readr: Read Rectangular Text Data. R package version 1.3.1. . 2018. <https://CRAN.R-project.org/package=readr>.
27. Katoh K, Standley DM. MAFFT multiple sequence alignment software version 7: improvements in performance and usability. *Mol Biol Evol* 2013; **30**(4): 772-80.
28. De Maio N, C W, N G. <https://virological.org/t/issues-with-sars-cov-2-sequencing-data/473/10> (accessed May 29th 2020).

29. Minh BQ, Schmidt HA, Chernomor O, et al. IQ-TREE 2: New Models and Efficient Methods for Phylogenetic Inference in the Genomic Era. *Mol Biol Evol* 2020; **37**(5): 1530-4.
30. Sagulenko P, Puller V, Neher RA. TreeTime: Maximum-likelihood phylodynamic analysis. *Virus Evol* 2018; **4**(1): vex042.
31. GISAID - Clade and lineage nomenclature aids in genomic epidemiology of active hCoV-19 viruses. <https://www.gisaid.org/references/statements-clarifications/clade-and-lineage-nomenclature-aids-in-genomic-epidemiology-of-active-hcov-19-viruses/> (accessed 21.08.2020 2020).

## Supplementary Figures Legends

**Figure S1. Age distribution by sex for the time period between February 24<sup>th</sup> and March 23<sup>rd</sup> for all tests, positive tests, and for patient isolates from which whole genomes were generated.** Solid lines for females, dashed lines for males.

**Figure S2. The COVGAP pipeline.** The steps shown ensure the calculation of high quality consensus sequences. Particularly, information on read coverage is retained and used both in the variant calling procedure and in the draft of the consensus independently from the called variants. Finally, the quality of the genome from each sample is scored by %Ns, which determines whether the produced sequence is retained or discarded.

**Figure S3. COVGAP evaluation of sequencing quality parameters.**

Of the original 746 samples, 689 successfully sequenced. Number of mapped reads across all SARS-CoV-2 positive samples successfully sequenced from 26th of February till 23th of March: (n=689), of which 533 passed the quality filter, and 156 failed. 468 of the samples passing the quality filters were matching the cohort eligibility criteria and therefore were further described in the present study. **A.** Number of mapped reads against Ct values from diagnostic tests; **B.** Number of mapped reads against percentage of Ns in the consensus.

**Figure S4. COVGAP identifies all SNPs in the mock genomes.** **A.** Levenshtein distance between the mutations in the input mock genomes (y axis) and in the genomes recovered by COVGAP (x axis); the marginal plots show the frequency of presence / detection across samples. Only two deletions (5845, 16281) and one insertion (16145) were not detected. **B.** Phylogeny of input and COVGAP-derived consensus output genomes, showing that all SNPs were identified.

**Figure S5. Representative diagnostic output from COVGAP.** This output generated per sample, indicates (from top to bottom): **A.** the coverage –not represented if over 1000x; **B.** which variants were detected in which position of the genome, and their corresponding annotation; **C.** low coverage regions (under 50x); **D.** genome annotation; and **E.** genome size markers as reference. Of note, a report generated in parallel provides further information on the variants, including which amino acids are affected by the variant.

**Figure S6. Divergence tree and zoom into additional sequence clusters, which did not result in large community spread.** **A.** Isolates from Basel area cohort in global context. **B.** A small clade assigned to B.1.5 consists of two clusters with an accumulation of samples from Basel. **C.** Cluster within lineage B.1.8 with two Basel samples without known epidemiological link. **D.** Two family cluster within lineage B.2 that did not spread further into the Basel community.

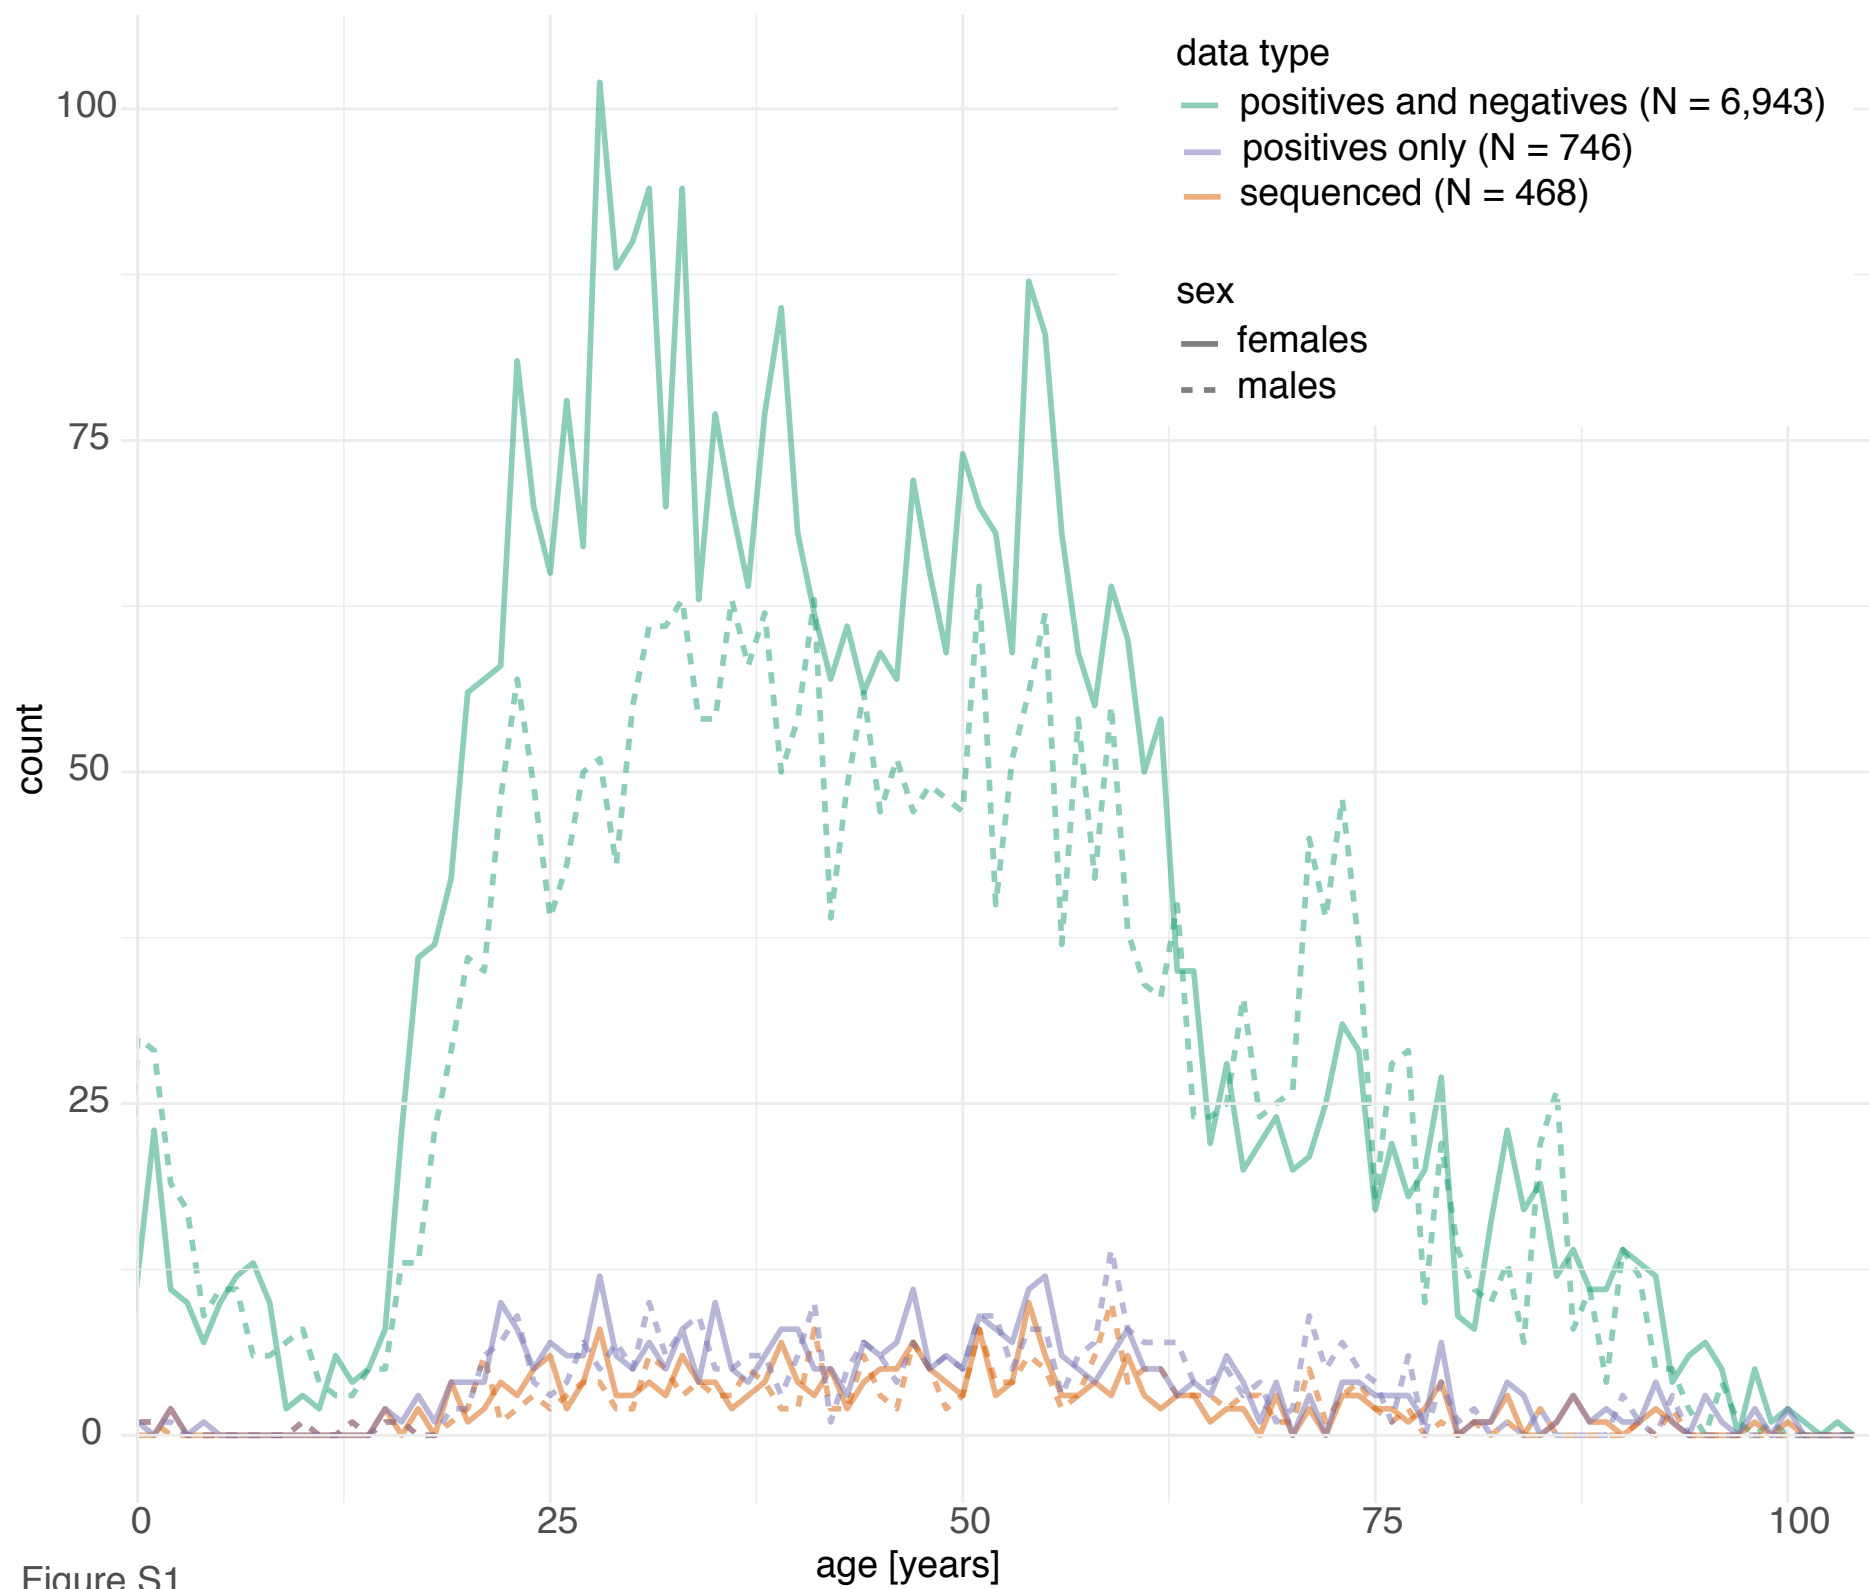

Figure S1.

### Quality filter:

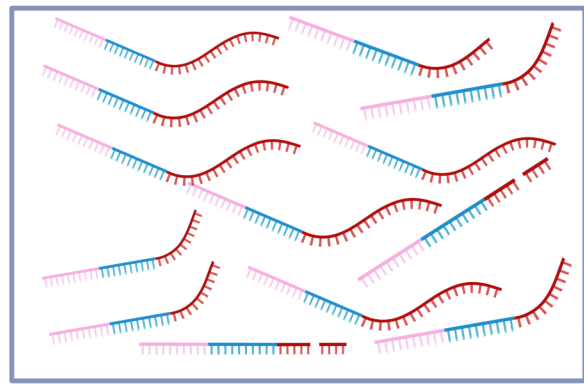

### Mapping:

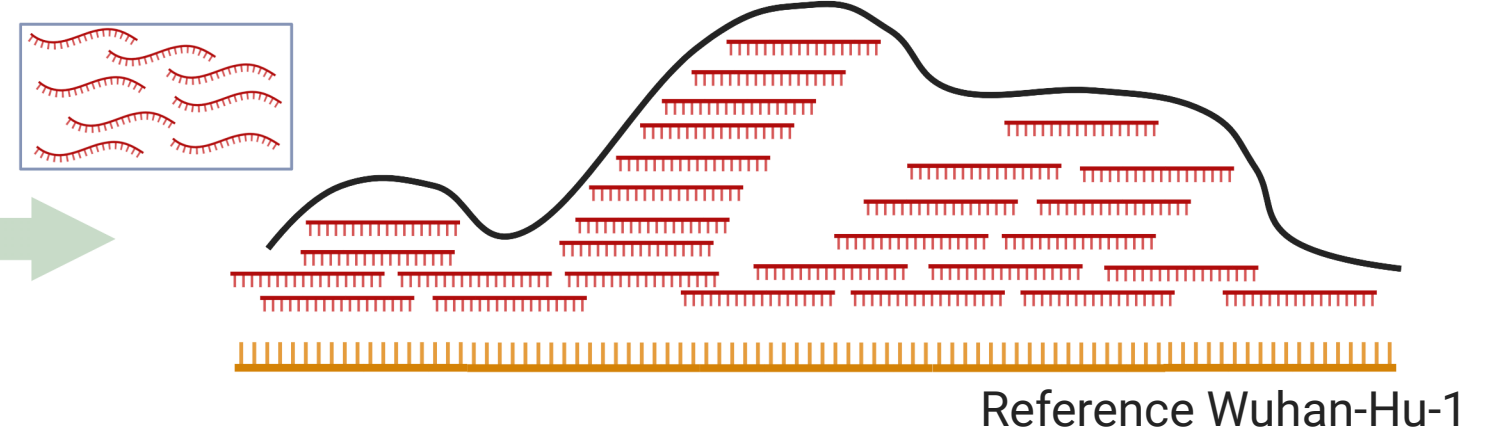

### Coverage filter :

only positions covered by more than 50 reads are considered highly covered

Low coverage regions

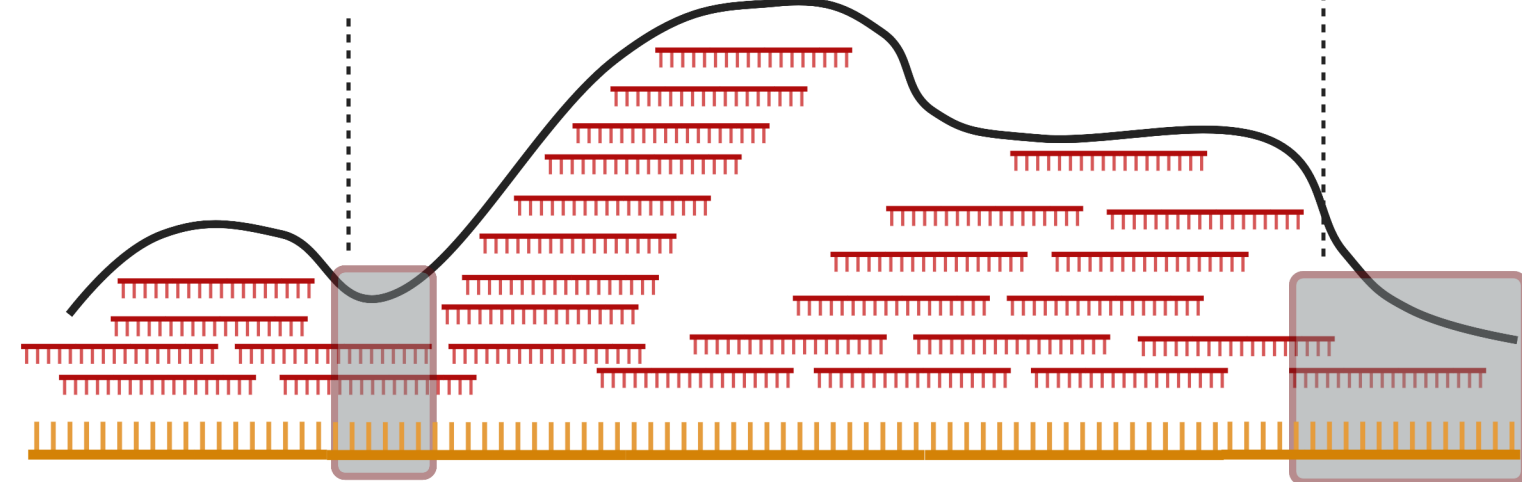

### Calling only highly read-supported variants:

only mutations supported by 70% of available reads and not in low covered regions are retained

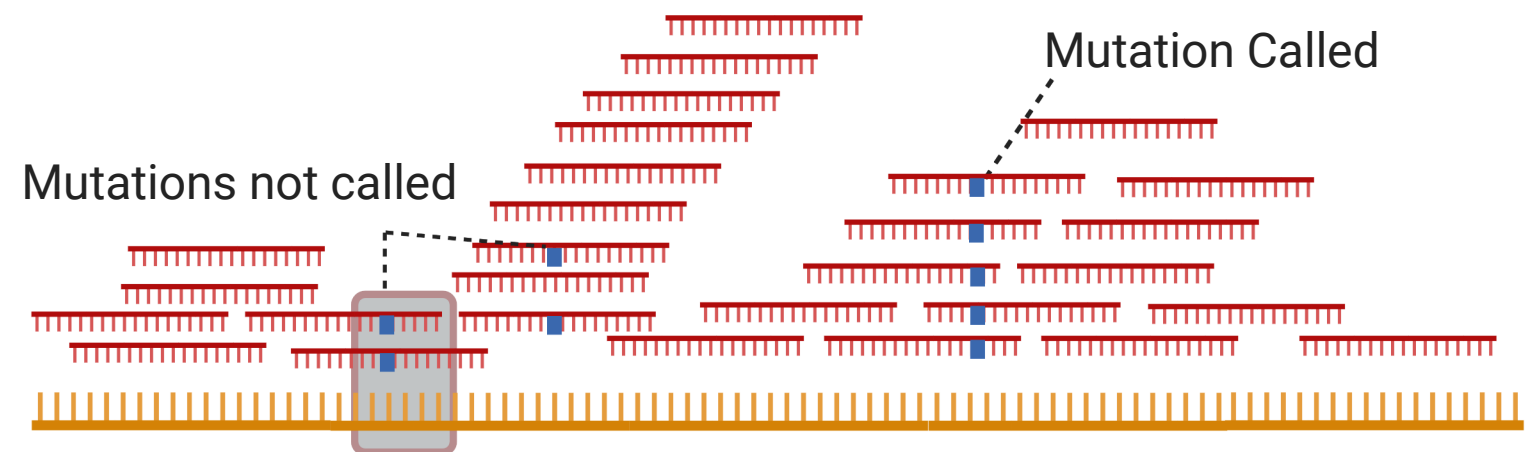

### Consensus sequence generation:

Called mutation

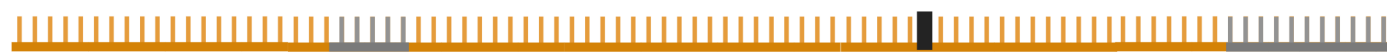

Low coverage regions are masked with N, replacing reference sequence

### QC checking:

sequences with > 10% Ns are discarded

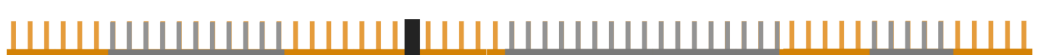

### QC checking:

sequences with < 10% Ns are retained

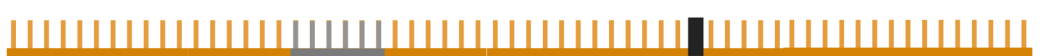

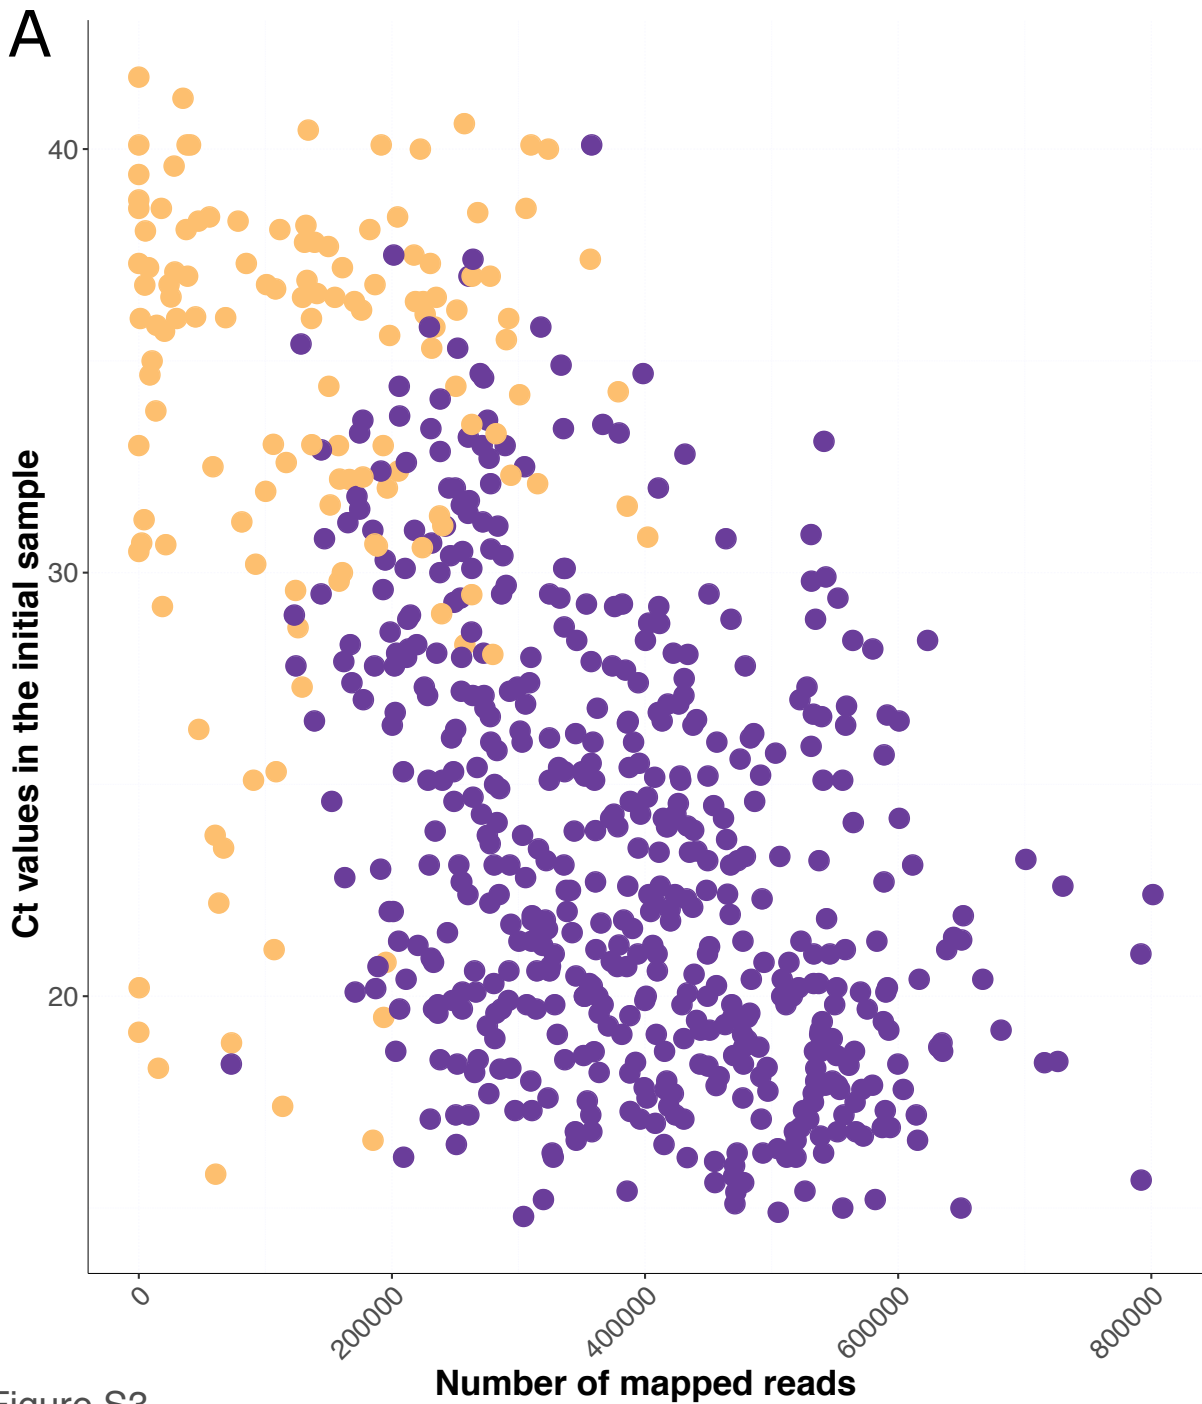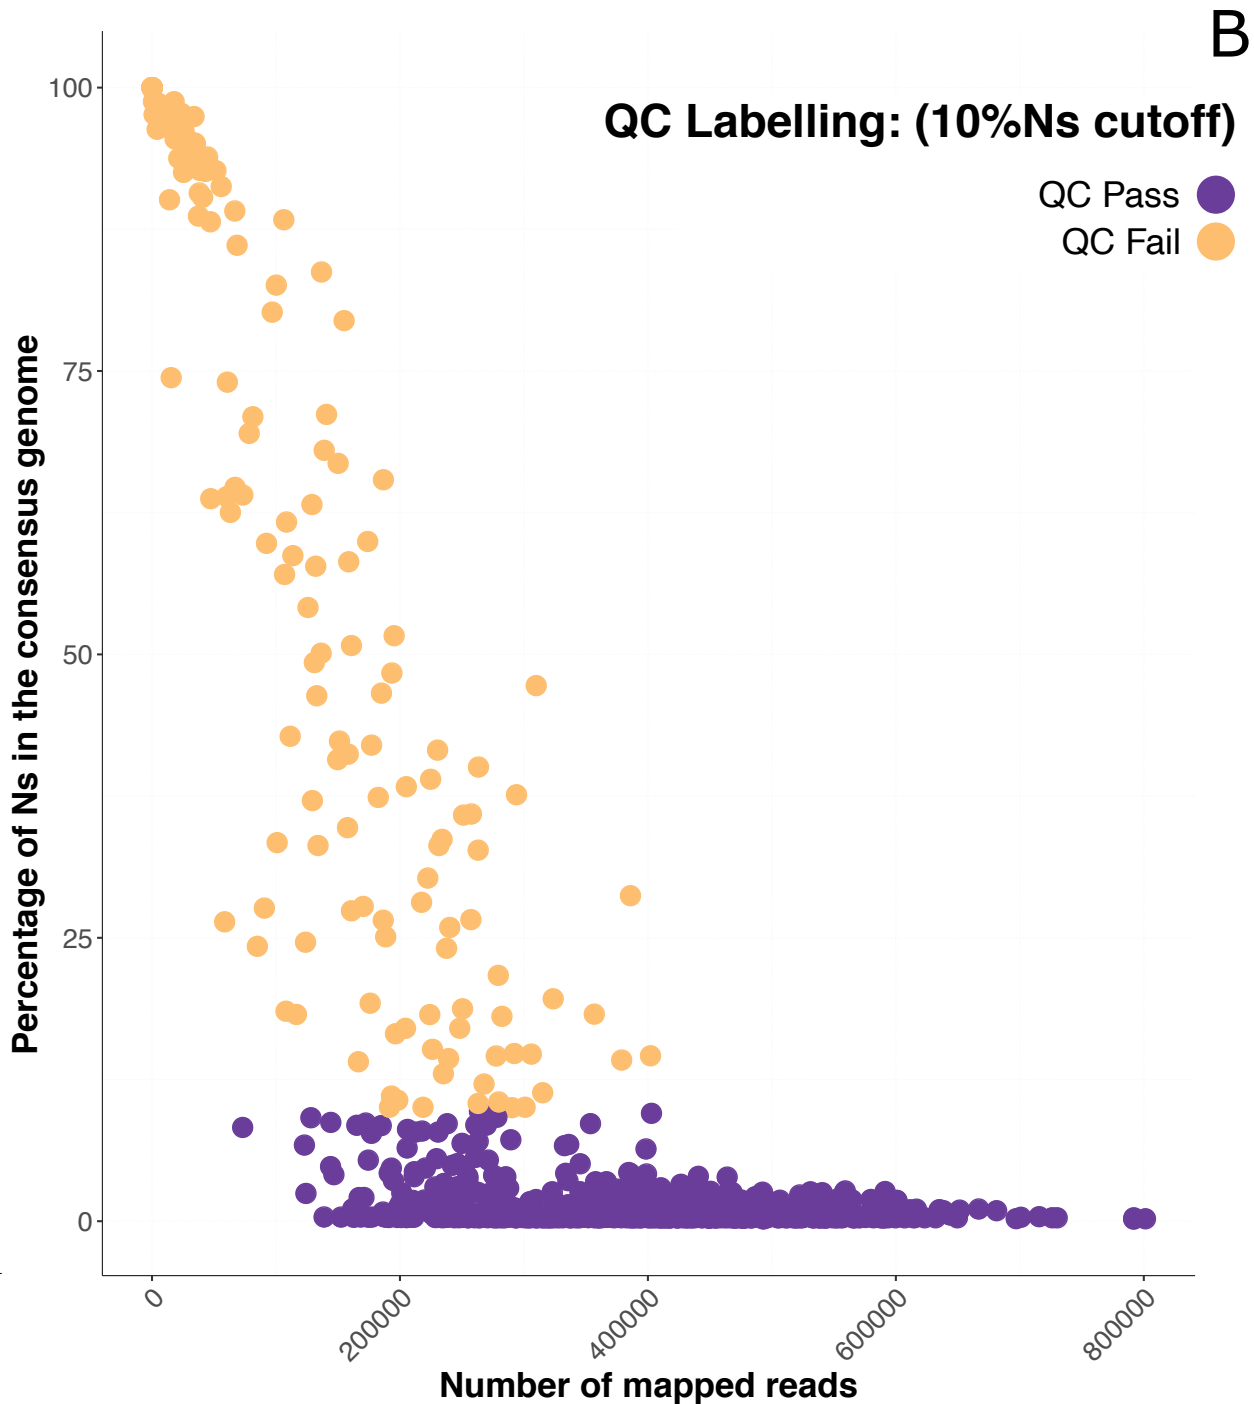

Figure S3.

mutation frequency across samples

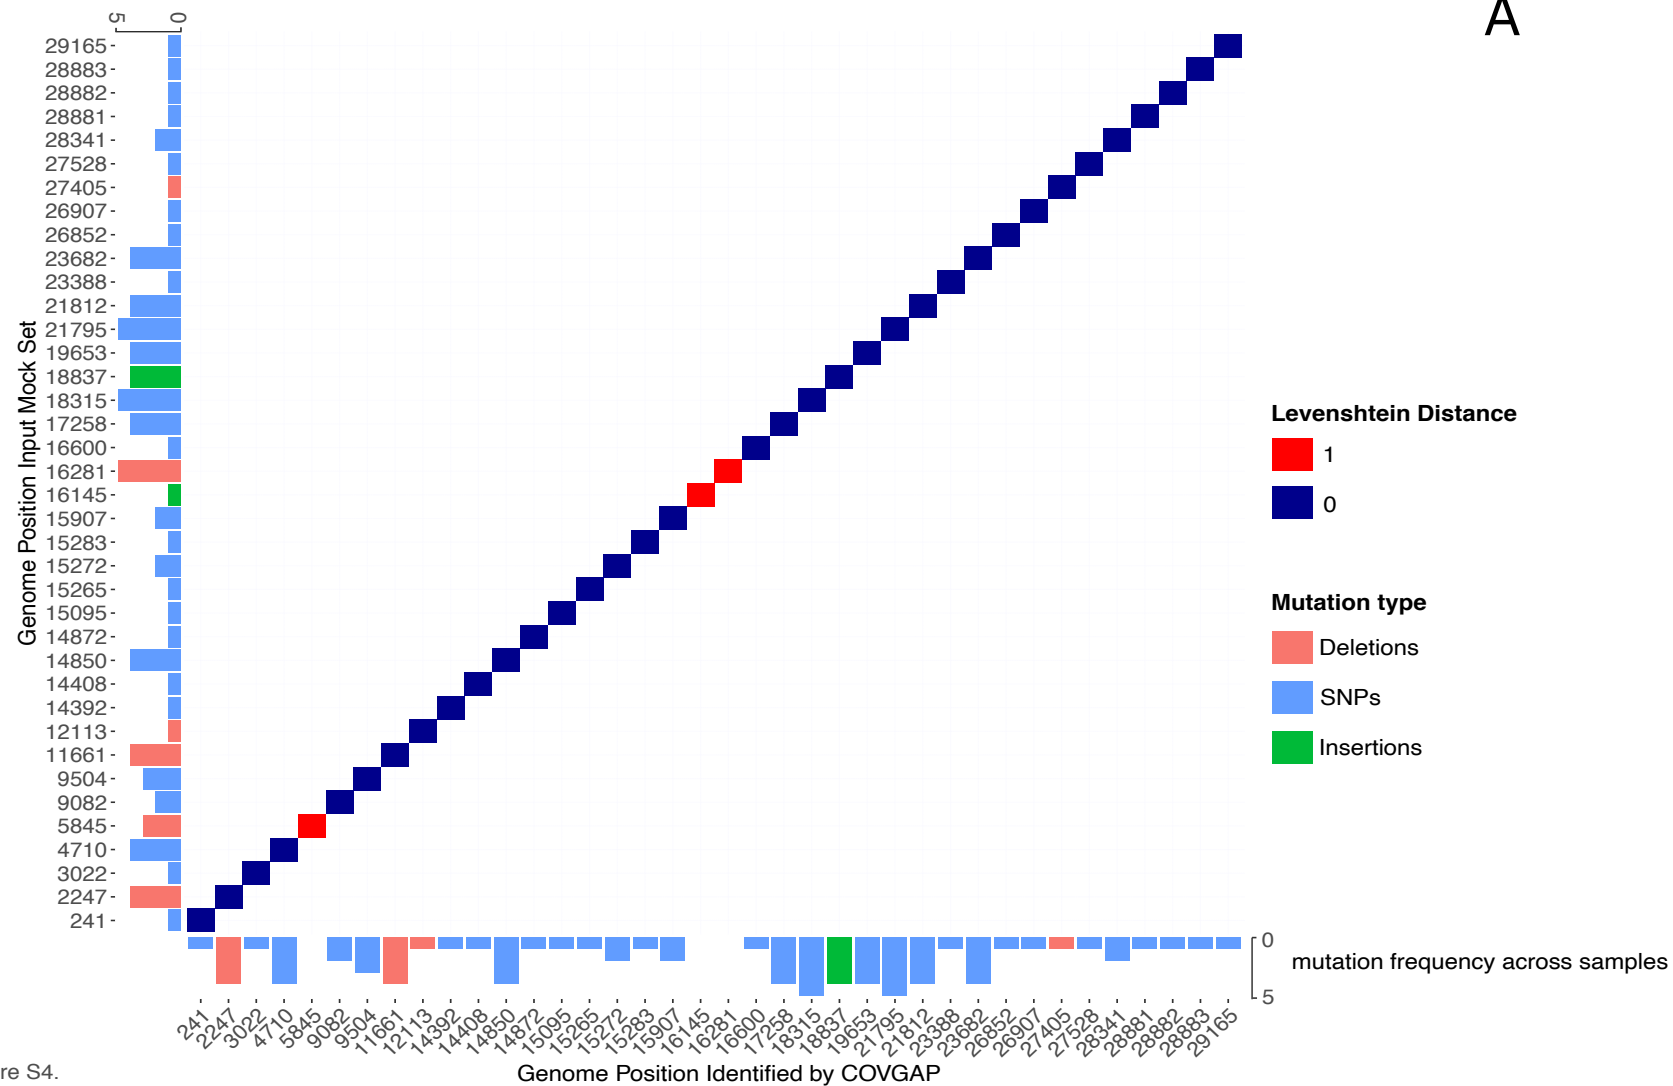

A

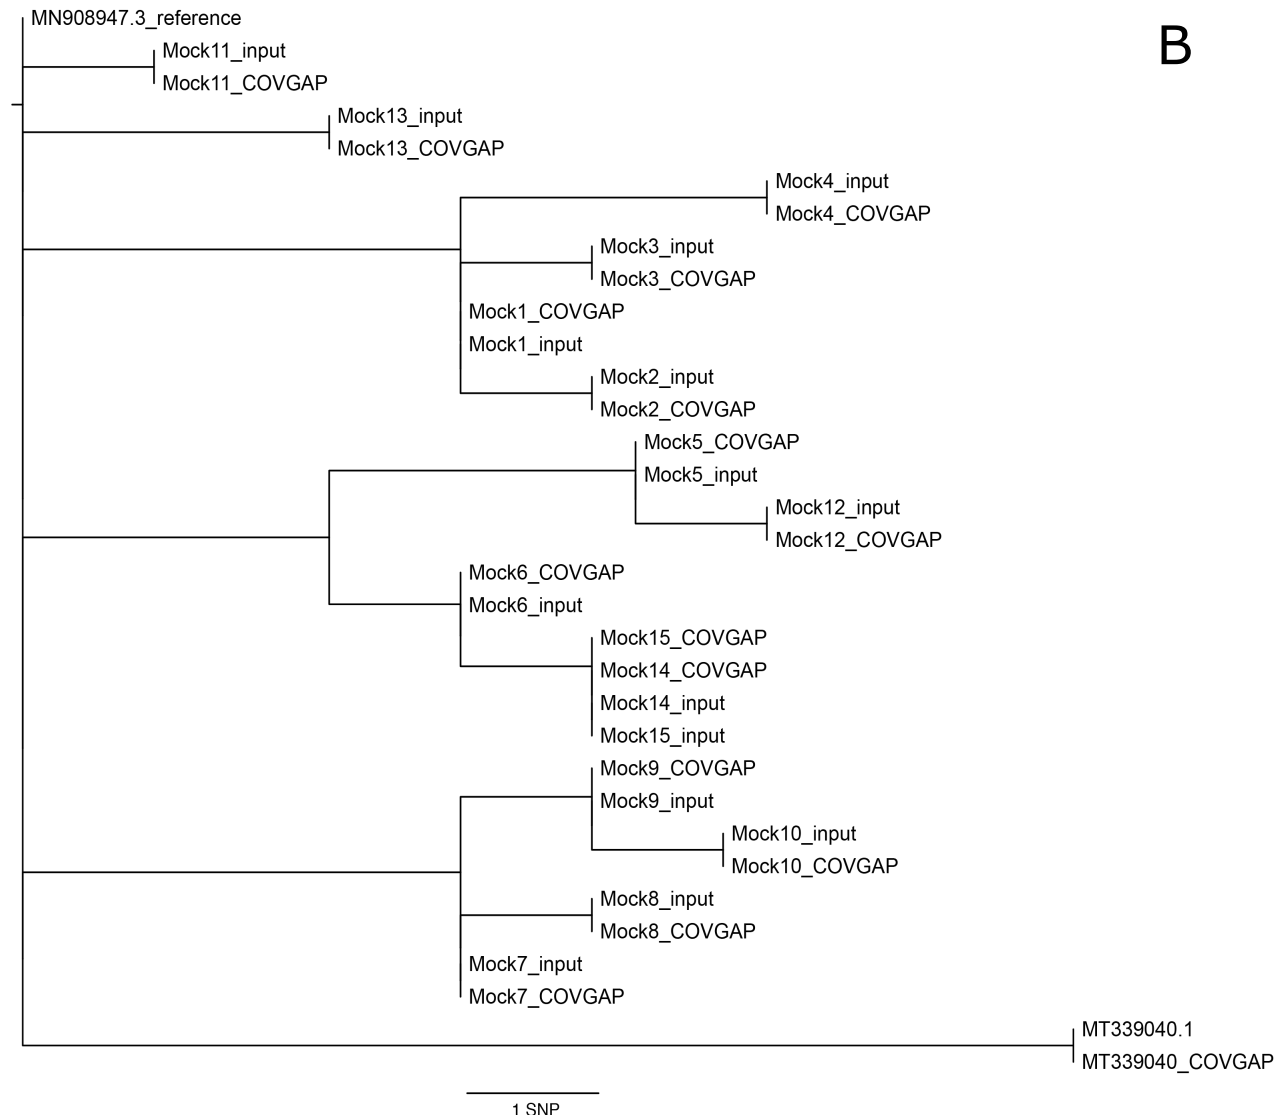

Figure S4.



# Sample number: 42219995

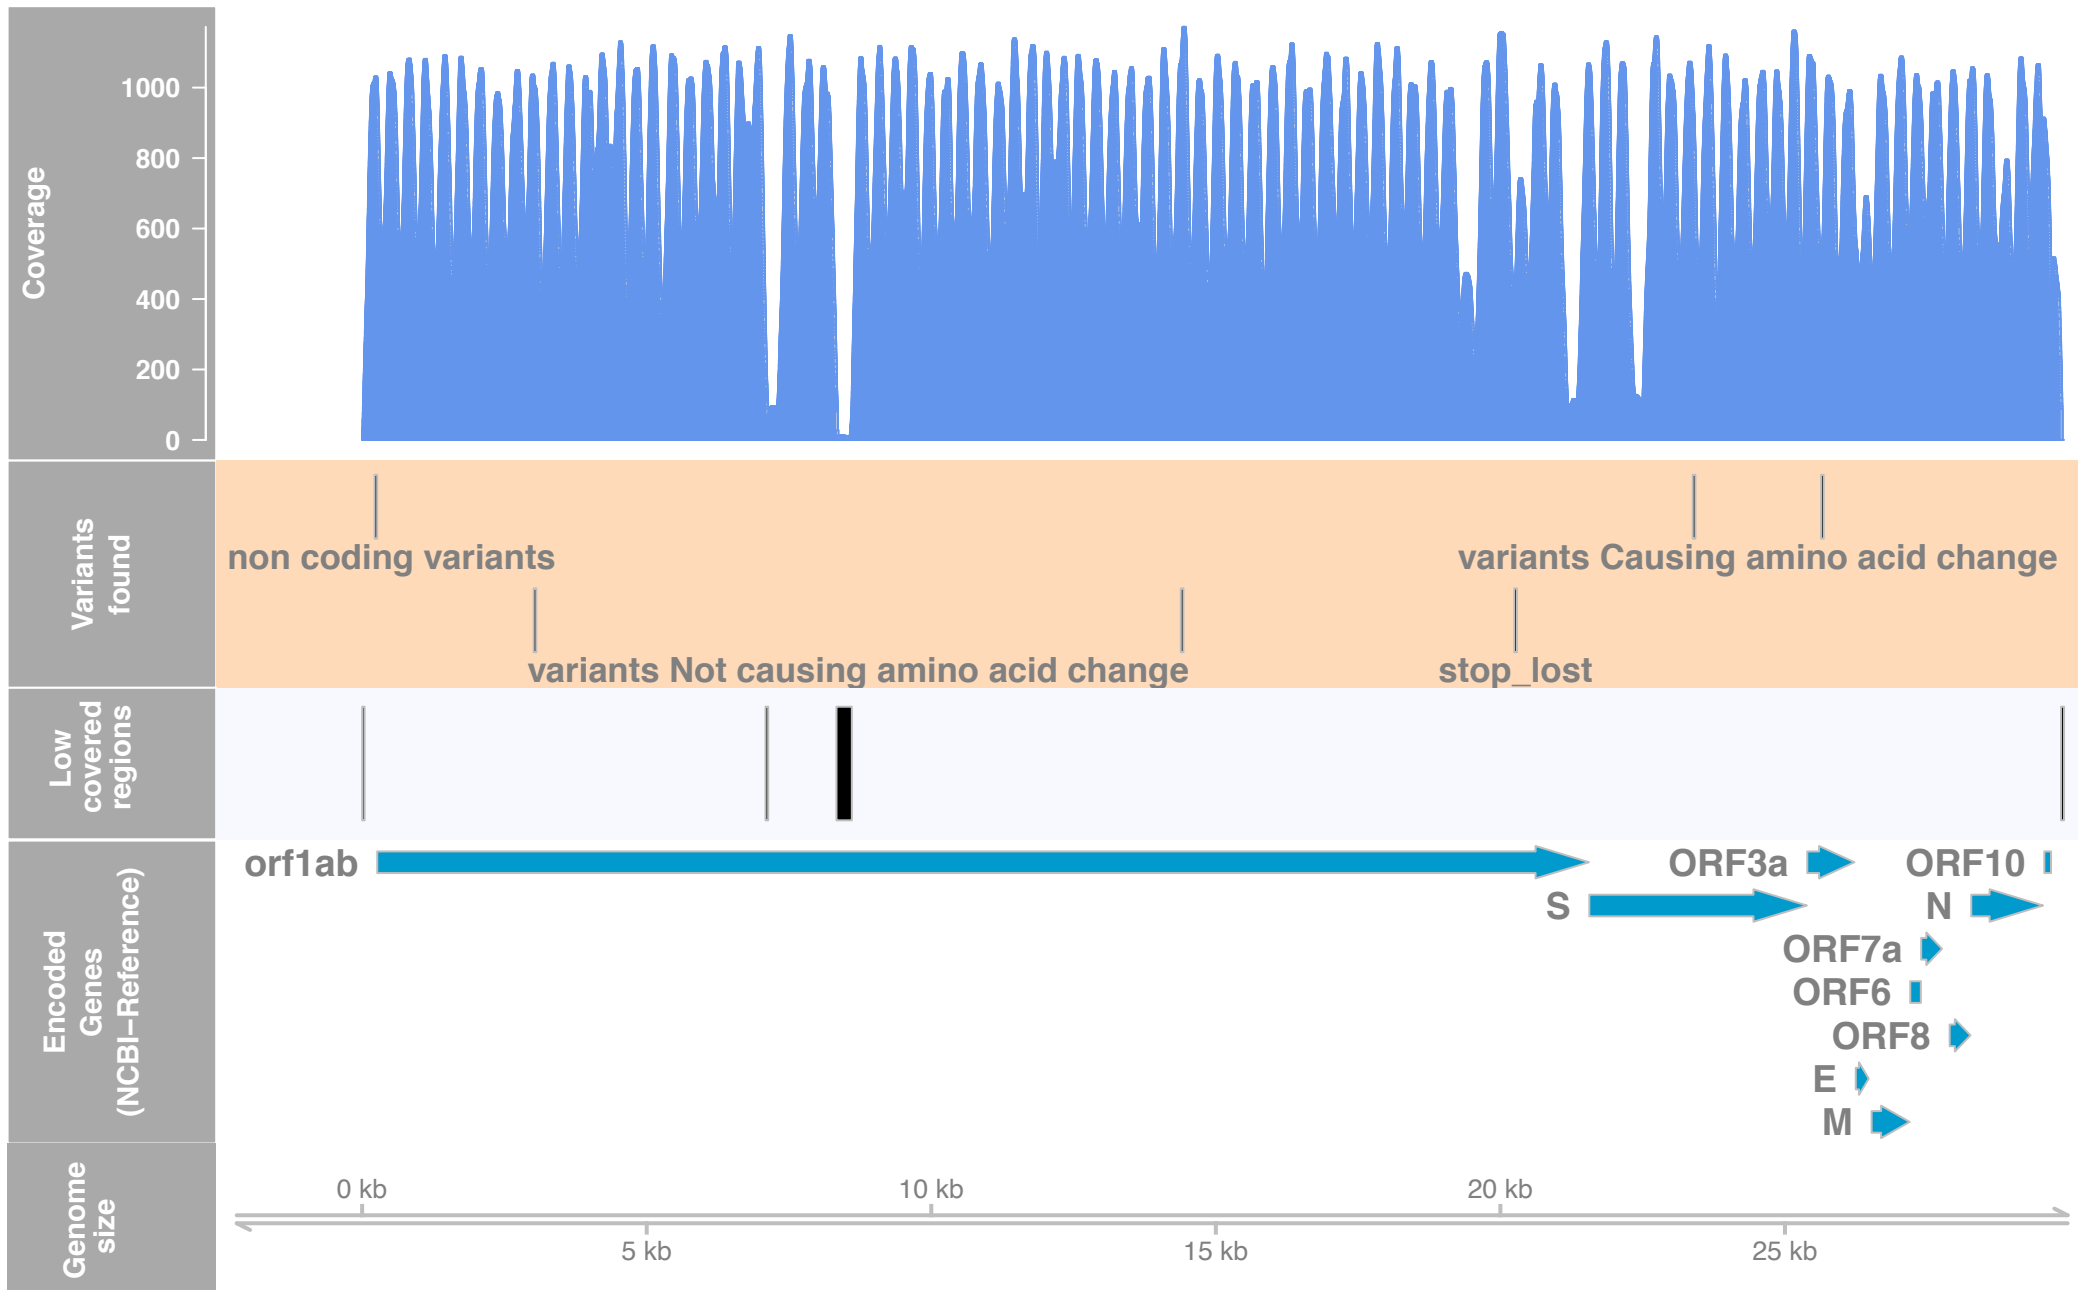

Figure S5.

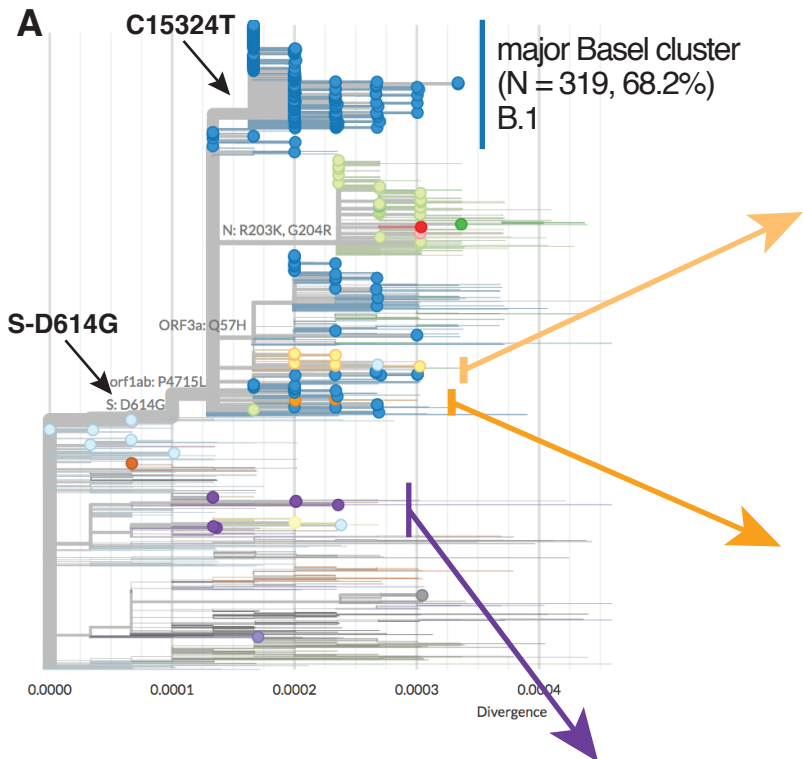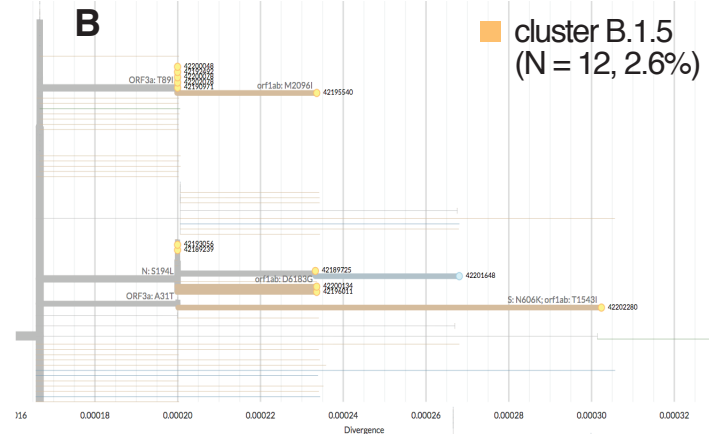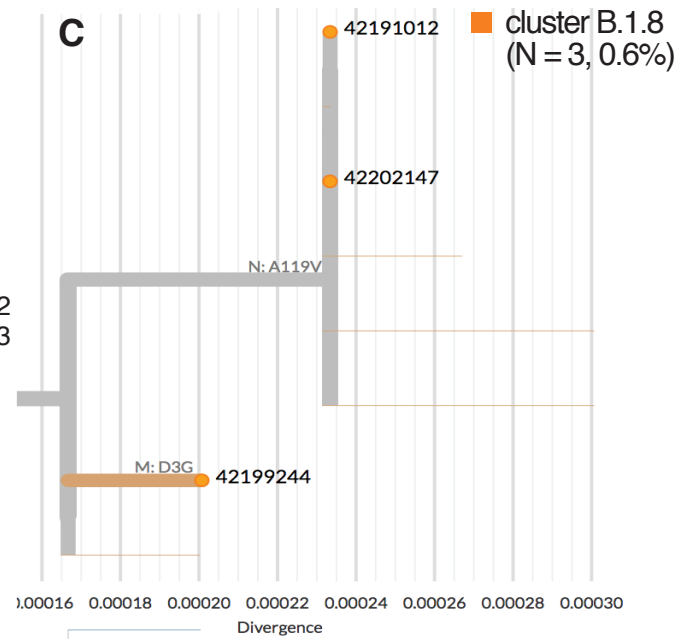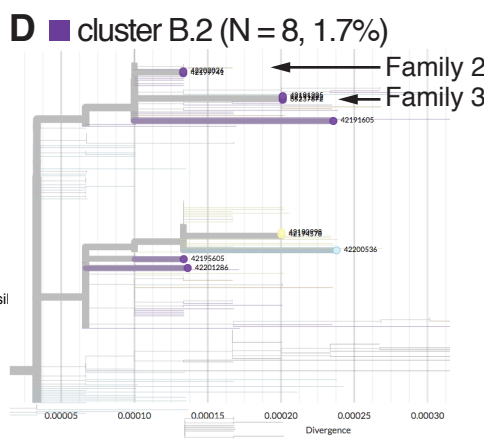

- Sars-CoV-2 genetic lineages**
- A.2 (Spain/ Chile/ Australia/ Europe)
  - A.5 (Spain/ South-America)
  - B (global export from China<sup>SNPs T8782C, C28144T</sup>)
  - B.1 (European, Italian outbreak)
  - B.1.1 (Europe / UK<sup>SNPs G28881A, G28882A, G28883C</sup>)
  - B.1.1.1 (Europe/ UK)
  - B.1.1.10 (UK/ Iceland)
  - B.1.1.6 (Austria)
  - B.1.5 (England/ Spain/ Turkey/ Australia/ USA/ Brasil)
  - B.1.8 (Netherlands/Europe)
  - B.10 (UK)
  - B.2 (Europe/Australia)
  - B.2.1 (Global)
  - B.3 (Wales)

Figure S6.
